# Supplementary material
Source: PubMed Central journal article supplement (PMC7271369)
Supplement: ao0c01072_si_001.pdf [file ao0c01072_si_001.pdf]

## Supporting Information

### Increased Active Sites on Irregular Morphological $\alpha$ -Fe<sub>2</sub>O<sub>3</sub> Nanorods for Enhanced Photoelectrochemical Performance

Jiawei Sun<sup>a</sup>, Weiwei Xia<sup>a\*</sup>, Qian Zheng<sup>a</sup>, Xianghua Zeng<sup>a,b\*</sup>, Wei Liu<sup>c</sup>, Gang Liu<sup>a</sup>, Pengdi Wang<sup>a</sup>

<sup>a</sup> College of Physics Science and Technology & Institute of Optoelectronic Technology, Yangzhou University, Yangzhou 225002, P.R. China

<sup>b</sup> College of Electrical, Energy and Power Engineering, Yangzhou University, Yangzhou 225127, P. R. China

<sup>c</sup> State Key Laboratory of Bioelectronics, School of Biological Sciences & Medical Engineering, Southeast University, Nanjing 210096, P. R. China

## Supporting Information

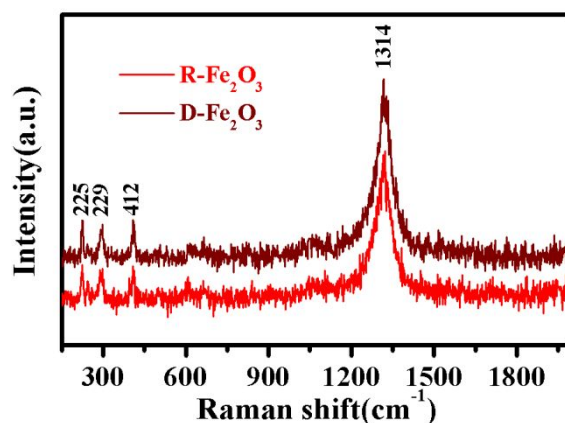

\* Corresponding authors. Email: [xhzeng@yzu.edu.cn](mailto:xhzeng@yzu.edu.cn)

**Figure S1.** Raman spectra of as obtained R-Fe<sub>2</sub>O<sub>3</sub> and D-Fe<sub>2</sub>O<sub>3</sub> nanostructured arrays.

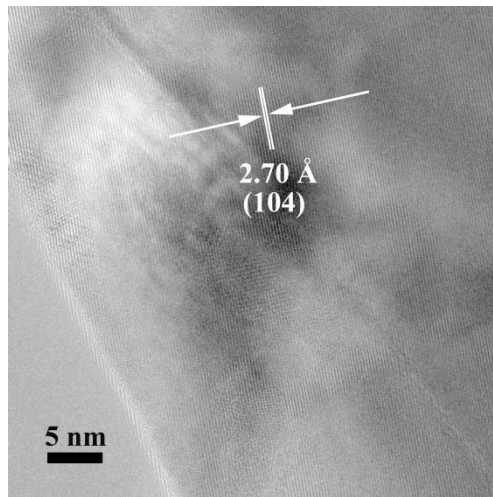

**Figure S2.** High-magnification image of a selected individual R-Fe<sub>2</sub>O<sub>3</sub> nanorod.

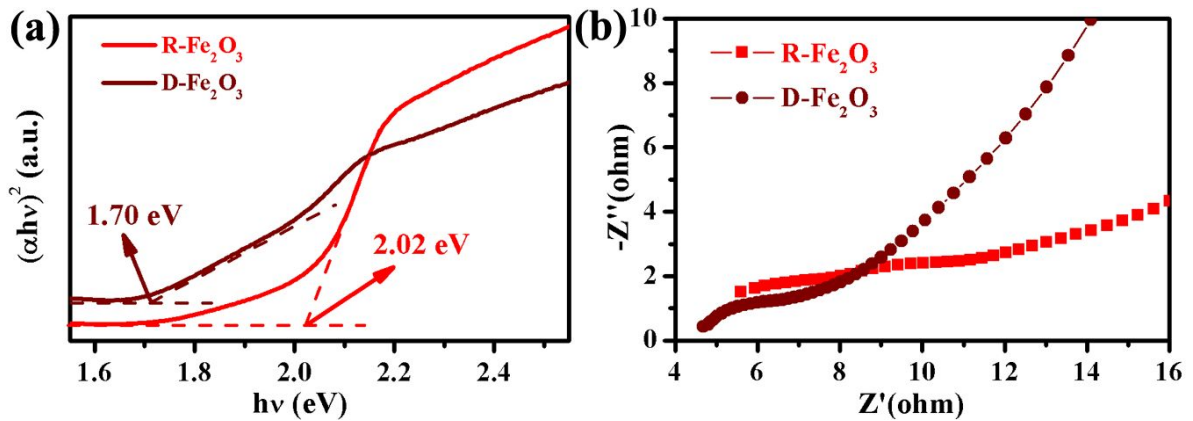

**Figure S3.** (a) Tauc plots evaluating the optical band gap is shown for R-Fe<sub>2</sub>O<sub>3</sub> and D-Fe<sub>2</sub>O<sub>3</sub> nanostructured arrays. (b) the enlargement of EIS spectra of R-Fe<sub>2</sub>O<sub>3</sub> and D-Fe<sub>2</sub>O<sub>3</sub> photoanodes in high frequency region.

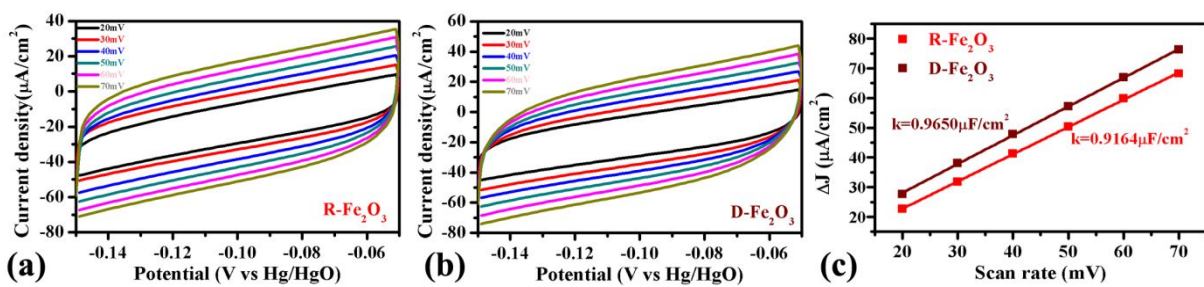

**Figure S4.** Linear cyclic voltammetry of R-Fe<sub>2</sub>O<sub>3</sub> (a) and D-Fe<sub>2</sub>O<sub>3</sub> (b) and (c) difference in current density variation plotted against scan rate.

Table S1. Comparison of PEC performance and morphology of different hematite

| Material                                                                     | Electrolyte | Photocurrent density(mA/cm <sup>2</sup> )  | IPCE at 366 nm | Annealing temperature | Reference |
|------------------------------------------------------------------------------|-------------|--------------------------------------------|----------------|-----------------------|-----------|
| Fe <sub>2</sub> O <sub>3</sub> -TiO <sub>2</sub> -40<br>Micro-dumbbells      | 1 M NaOH    | 0.83<br>(1.6 V versus RHE)                 | 15%            | 500°C                 | [1]       |
| NiFe <sub>2</sub> O <sub>4</sub> /Fe <sub>2</sub> O <sub>3</sub><br>nanorods | 1 M KOH     | 0.304<br>(0.6 V versus Ag/AgCl)            | 0.03%          | 500°C                 | [2]       |
| Fe <sub>2</sub> O <sub>3</sub><br>nanorods<br>ferrihydrite<br>modified       | 1 M KOH     | 0.027<br>(1.23 V versus RHE)               | 6%             | 550°C                 | [3]       |
| Ti-Fe <sub>2</sub> O <sub>3</sub> nanorod<br>s                               | 1 M KOH     | 0.71<br>(1.23 V versus RHE)                | 12%            | 550°C                 | [4]       |
| Fe <sub>2</sub> O <sub>3</sub><br>nanoparticles                              | 1M NaOH     | 5x10 <sup>-4</sup><br>(0 V versus Ag/AgCl) | 0.5%           | 650°C                 | [5]       |
| Zr-doped<br>$\alpha$ -Fe <sub>2</sub> O <sub>3</sub><br>nanoflakes           | 1 M KOH     | 0.52<br>(1.5 V versus RHE)                 | 16%            | 700°C                 | [6]       |
| Fe <sub>2</sub> O <sub>3</sub><br>nanorods                                   | 1 M KOH     | 0.39<br>(1.23 V versus RHE)                | 9%             | 700°C                 | [7]       |
| Fe <sub>2</sub> O <sub>3</sub><br>nanorods                                   | 1 M NaOH    | 0.71<br>(1.23 V versus RHE)                | 9%             | 750°C                 | [8]       |
| irregular Fe <sub>2</sub> O <sub>3</sub><br>nanorods                         | 1 M KOH     | 0.15<br>(1.23 V versus RHE)                | 17%            | 550°C                 | This work |

## Reference

- (1) Zhang, P.; Yu, L.; Wen, X.; David, Lou. Construction of Heterostructured Fe<sub>2</sub>O<sub>3</sub>-TiO<sub>2</sub> Microdumbbells for Photoelectrochemical Water Oxidation. *Angew Chem.* 2018, 57, 15076-15080.
- (2) Zhang, Y.; He, J.; Yang, Q.; Zhu, H.; Wang, Q.; Xue, Q.; Yu, L. Solution quenched in-situ growth of hierarchical flower-like NiFe<sub>2</sub>O<sub>4</sub>/Fe<sub>2</sub>O<sub>3</sub> heterojunction for wide-range light absorption. *J Power sources.* 2019, 440, 227120.
- (3) Li, C.; Huang, C.; Chuah, X.; Raja, D.; Hsieh, C.; Lu, S. Ti-MOF derived Ti<sub>x</sub>Fe<sub>1-x</sub>O<sub>y</sub> Shells Boost Fe<sub>2</sub>O<sub>3</sub> Nanorod Cores for Enhanced Photoelectrochemical Water Oxidation. *Chem. Eng. J.* 2019, 361, 660-670.
- (4) Bu, Q.; Li, S.; Wu, Q.; Bi, L.; Wang, D.; Zou, X.; Xie, T. Ferrihydrite modified Ti-Fe<sub>2</sub>O<sub>3</sub> as an effective photoanode: The Role of Interface Interactions in Enhancing the Photocatalytic Activity of Water Oxidation. *ChemSusChem.* 2018, 11, 3486-3494.
- (5) Ferial, B.; Lotfi, D.; B. Marí.; Brahim, B. Electrodeposited chromium-doped  $\alpha$ -Fe<sub>2</sub>O<sub>3</sub> thin film for solar water splitting. *Results in Physics.* 2020, 102996.
- (6) Rani, B.; Kumar, M.; Ravi, G.; Ravichandran, S.; Guduru, R.; Yuvakkumar, R. Electrochemical and photoelectrochemical water oxidation of solvothermally synthesized Zr-doped  $\alpha$ -Fe<sub>2</sub>O<sub>3</sub> nanostructures. *Appl. Surf. Sci.* 2019, 471, 733-744.

- (7) Li, W.; Wang, K.; Yang, X.; Zhan, F.; Wang, Y.; Liu, M.; Qiu, X.; Li, J.; Zhan, J.; Li, Q.; Liu, Y. Surfactant-assisted controlled synthesis of a metal-organic framework on Fe<sub>2</sub>O<sub>3</sub> nanorod for boosted photoelectrochemical water oxidation. *Chem. Eng. J.* 2020, 379, 122256.
- (8) Zhang, Q.; Wang, H.; Dong, Y.; Yan, J.; Ke, X.; Wu, Q.; Xue, S. In situ growth of ultrathin Co-MOF nanosheets on  $\alpha$ -Fe<sub>2</sub>O<sub>3</sub> hematite nanorods for efficient photoelectrochemical water oxidation. *Sol Energy.* 2018, 171, 388-396.
